# Supplementary material for: The Relationship between Gray Matter Quantitative MRI and Disability in Secondary Progressive Multiple Sclerosis
Source: PLOS journal article supplement (doi:10.1371/journal.pone.0161036), 2016-08-11

**a**

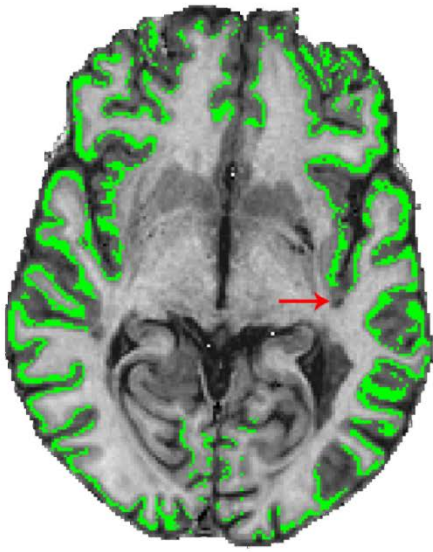

**b**

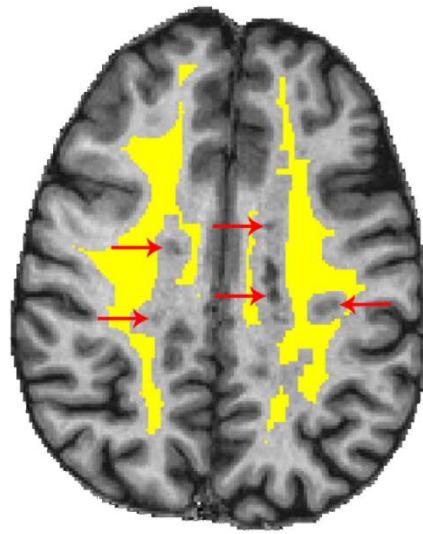

Supplement: S1 (10.1371/journal.pone.0161036.s001) [file journal.pone.0161036.s001.pdf]
